# Supplementary material for: Technical Note: The Divide and Measure Nonconformity
Source: Copernicus journal article supplement (doi:10.5194/hess-2024-59), 2024-02-29

Example depiction for the adaption of Fig. 2 in the revised manuscript:

### Impact of invested time on research output

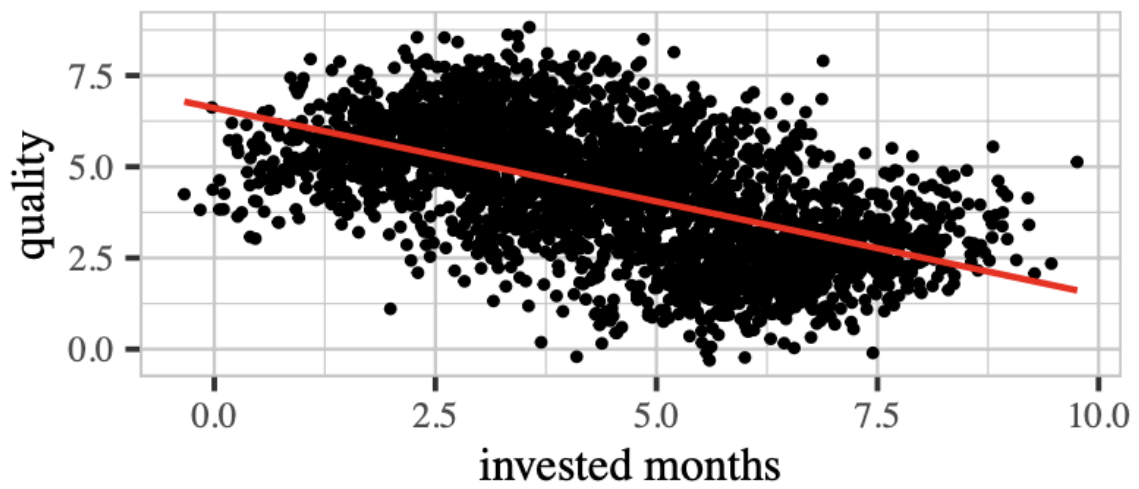

### Accounting for researcher seniority

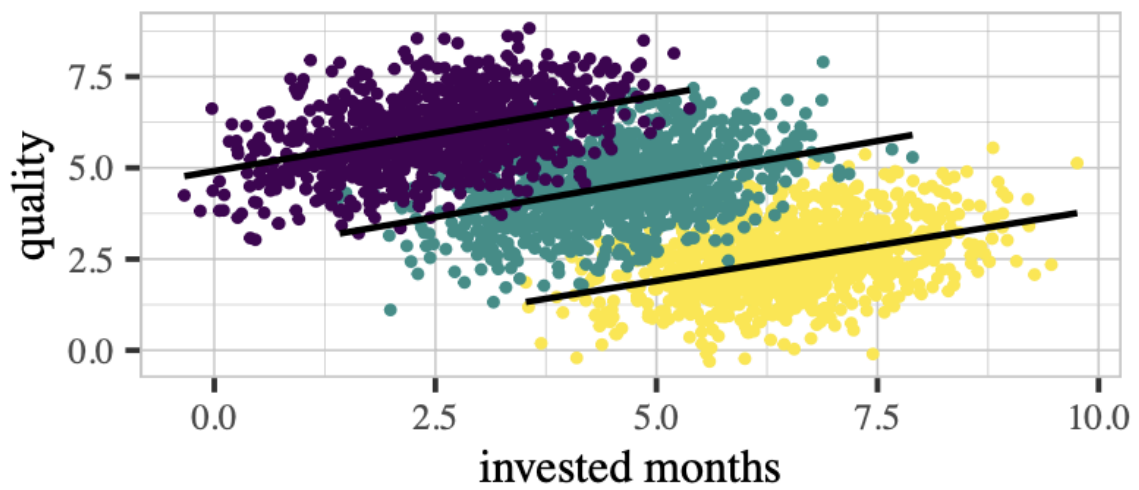

seniority:   • (a) Prof   • (b) Student   • (c) PhD

Example depiction for the adaption of Fig. 6 in the revised manuscript:

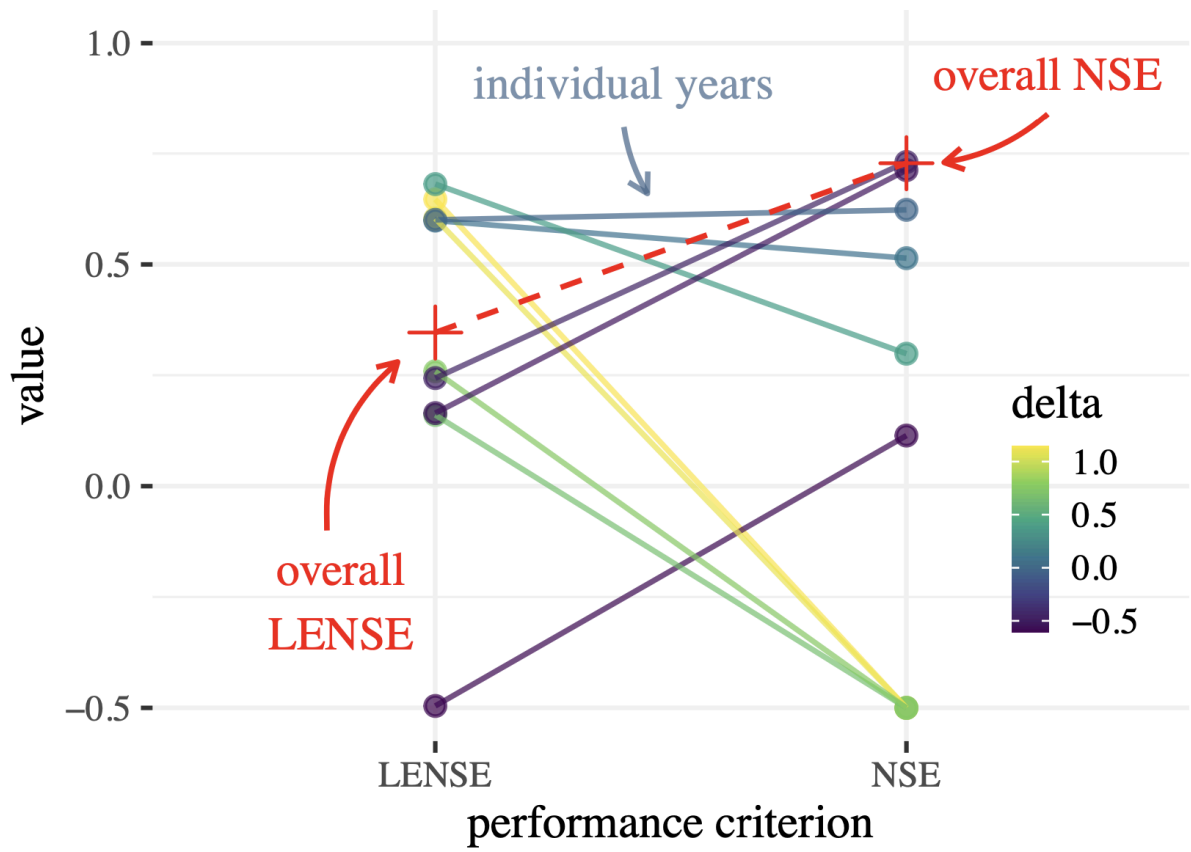

Supplement: Supplementary file [file hess-2024-59-AC1-supplement.pdf]
